# Supplementary material for: Connectivity map of bipolar cells and photoreceptors in the mouse retina
Source: eLife journal article supplement (doi:10.7554/elife.20041), 2016-11-25
Supplement: supp [file elife_poa_e20041_Figure_1_figure_supplement_1.pdf › elife_poa_e20041_Figure_1_figure_supplement_1.pdf]

A

Detection of volume  
contacts between cones  
and CBC9s

43/124 cones

Excluding  
non-invaginating or  
peripheral BC contacts  
(see B for examples)

14/124 cones

Excluding cones  
with only one CBC9  
contact and other CBC9  
dendrites passing by  
without contacting  
(see C for examples)

6/124 cones  
(see D for examples)

B

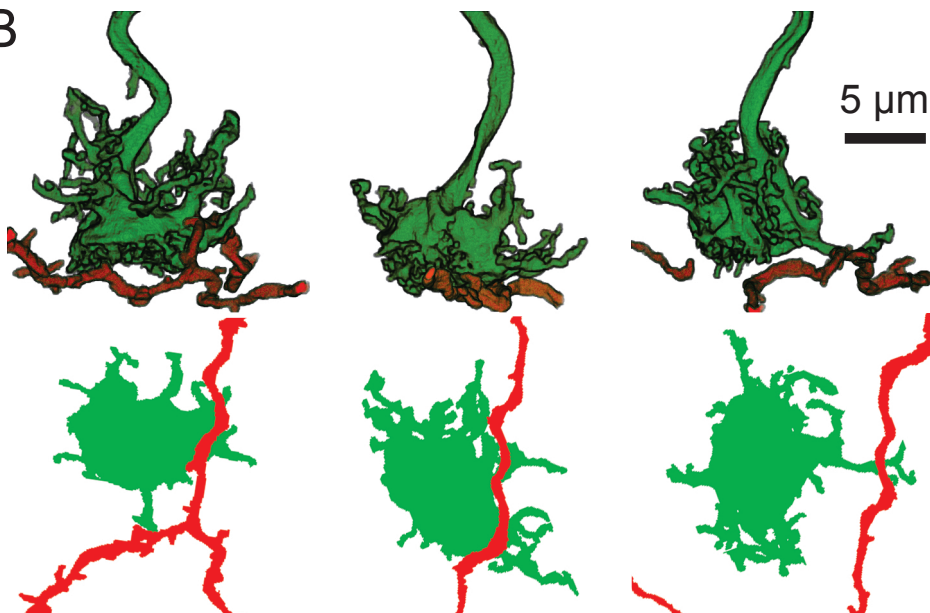

C

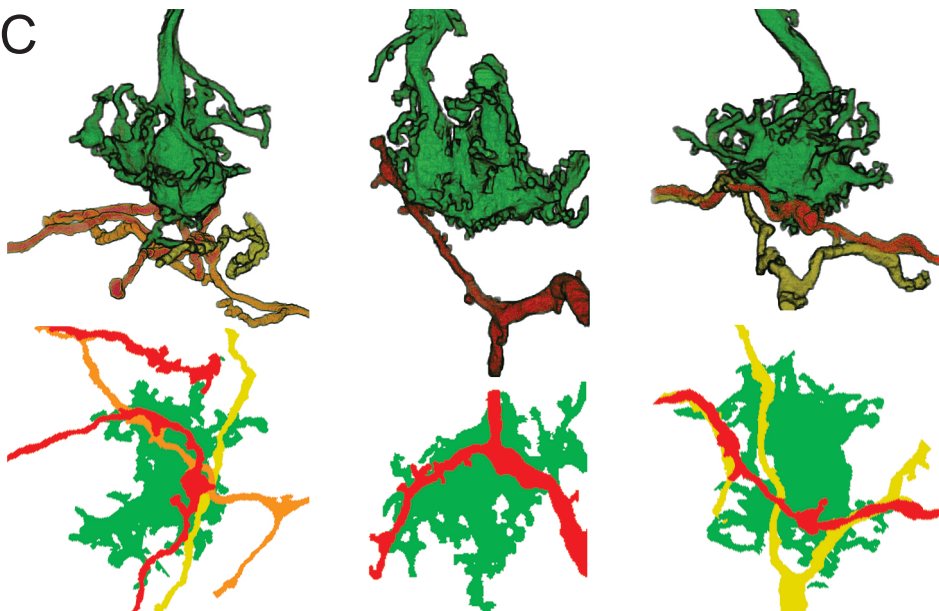

D

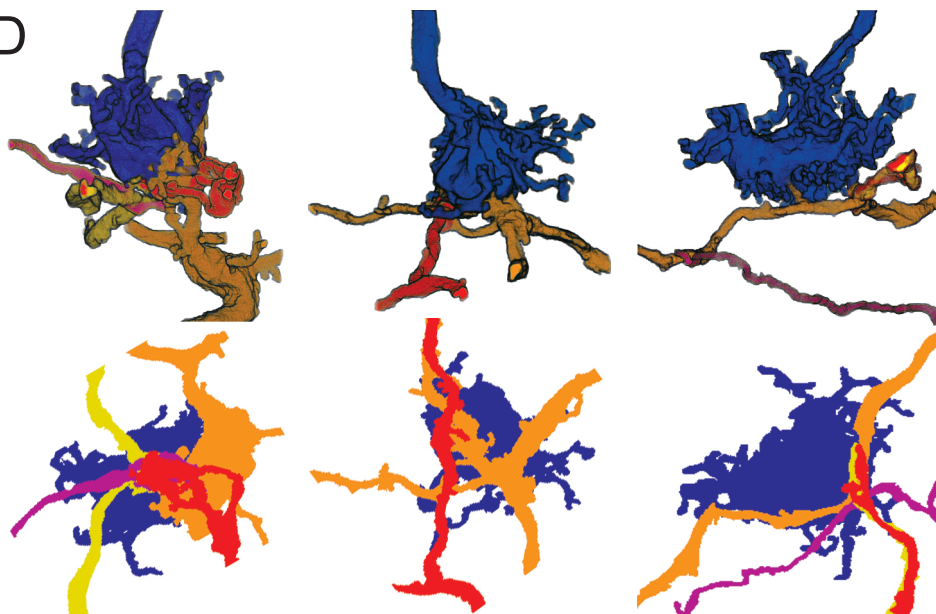

M-cone S-cone CBC9 CBC9 CBC9
