# Supplementary material for: Connectivity map of bipolar cells and photoreceptors in the mouse retina
Source: eLife journal article supplement (doi:10.7554/elife.20041), 2016-11-25

Human classification: contact  
Algorithm: no contact

no contact  
contact

cone OFF-CBC

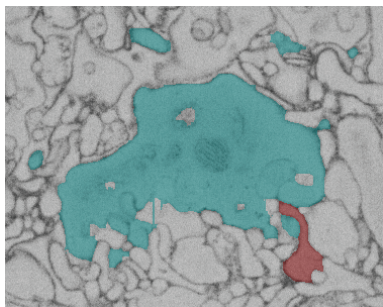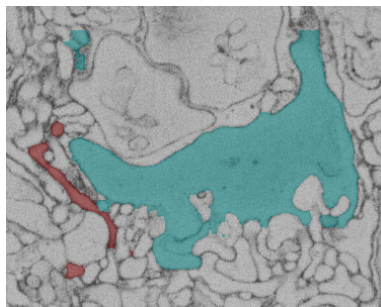

cone ON-CBC

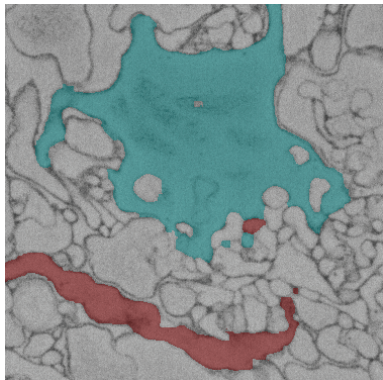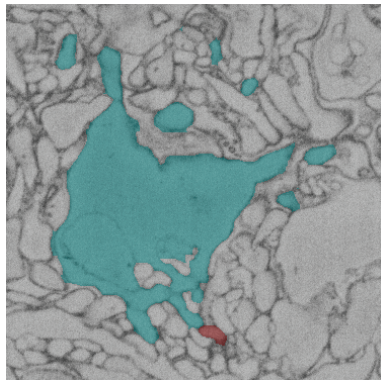

cone RBC

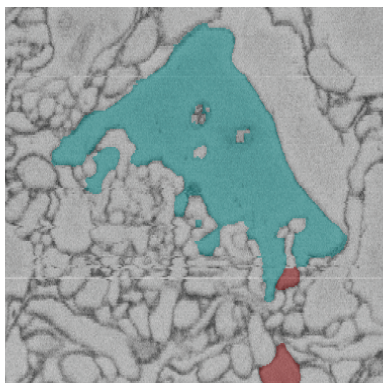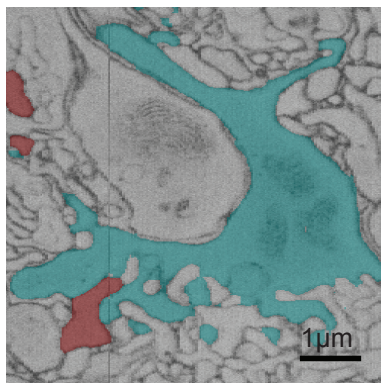

Supplement: supp [file elife_poa_e20041_Figure_2_figure_supplement_2.pdf › elife_poa_e20041_Figure_2_figure_supplement_2.pdf]
