# Supplementary figures and images for: Connectivity map of bipolar cells and photoreceptors in the mouse retina
Source: eLife journal article supplement (doi:10.7554/elife.20041), 2016-11-25

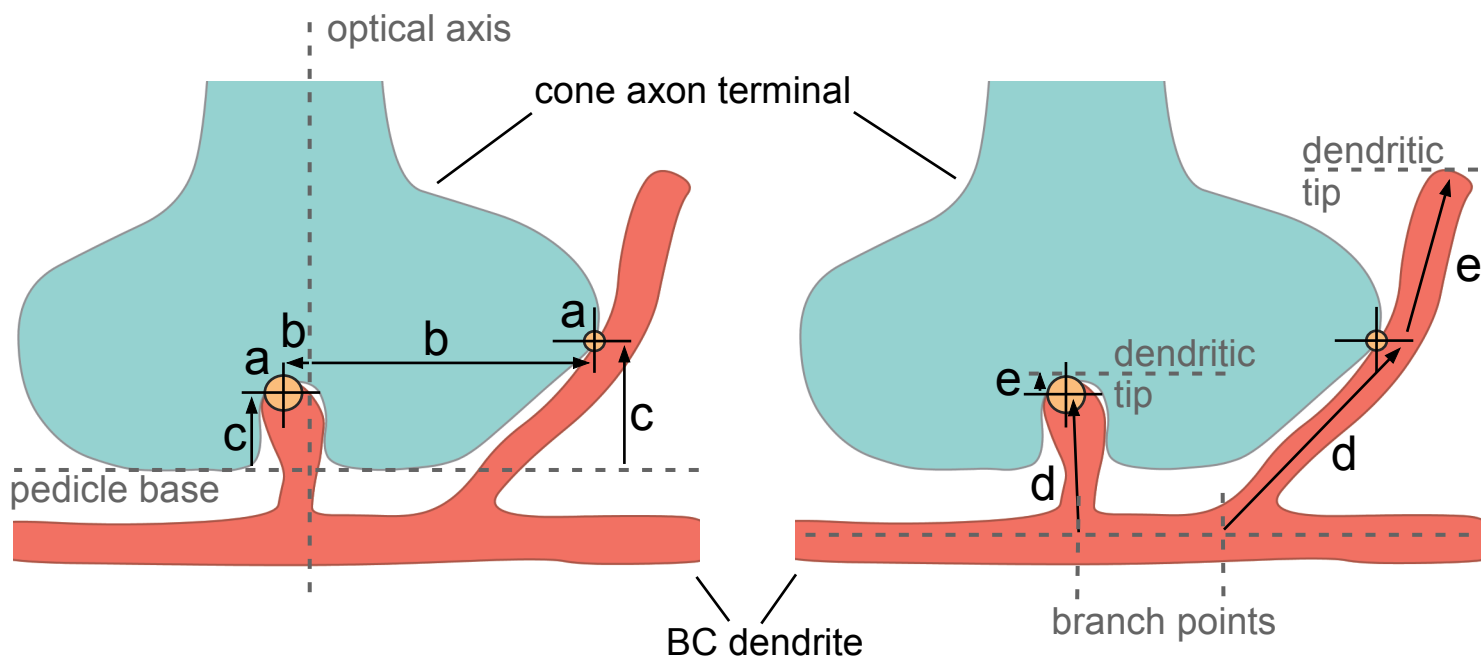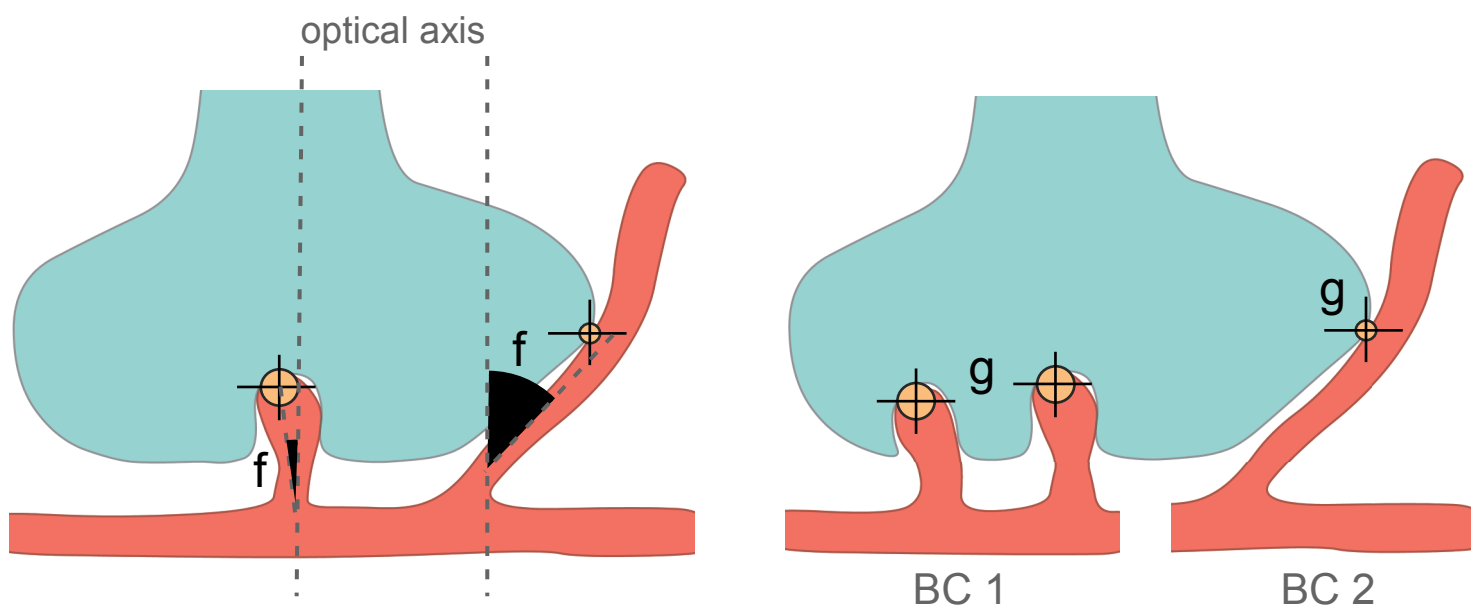

Supplement: supp [file elife_poa_e20041_Figure_2_figure_supplement_1.pdf › elife_poa_e20041_Figure_2_figure_supplement_1.pdf]

A

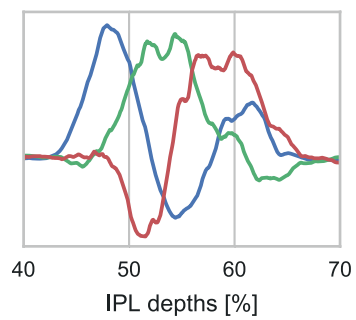

B

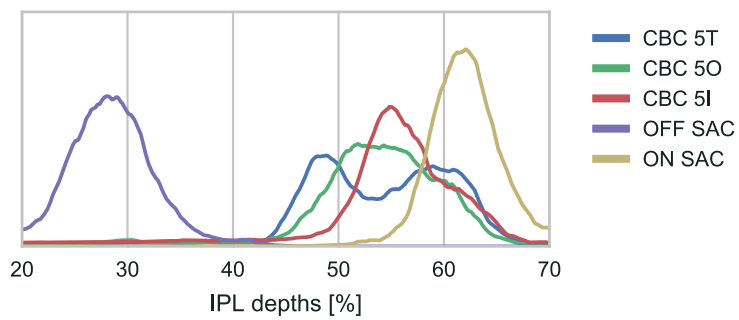

C

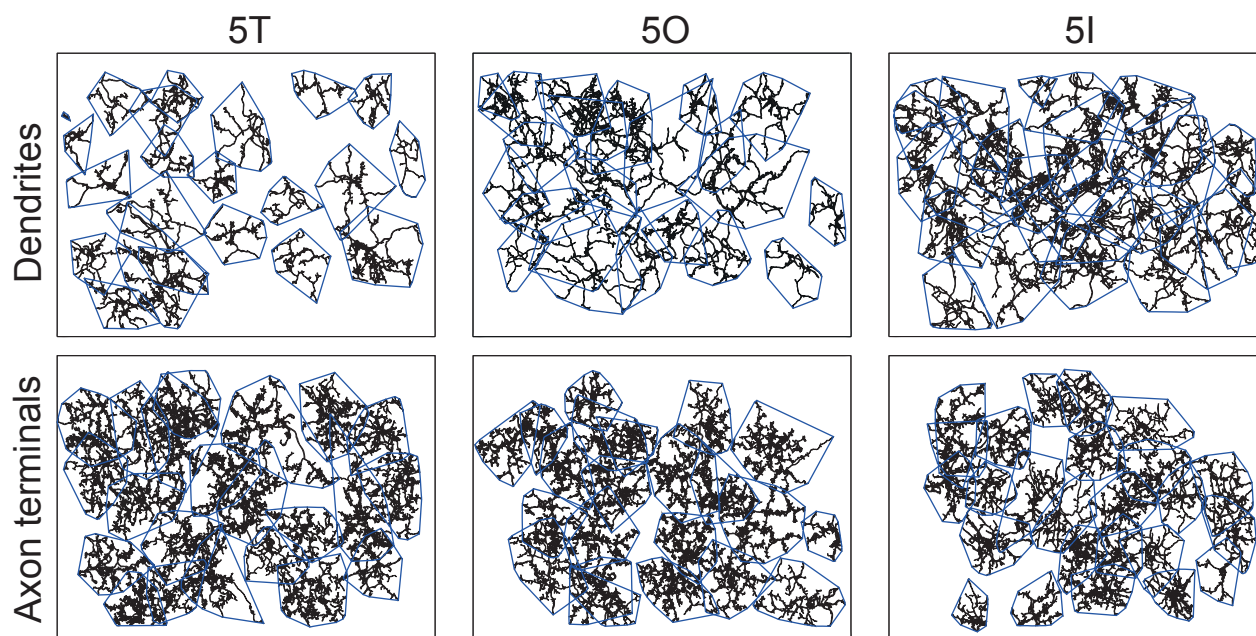

Supplement: supp [file elife_poa_e20041_Figure_3_figure_supplement1.pdf › elife_poa_e20041_Figure_3_figure_supplement1.pdf]

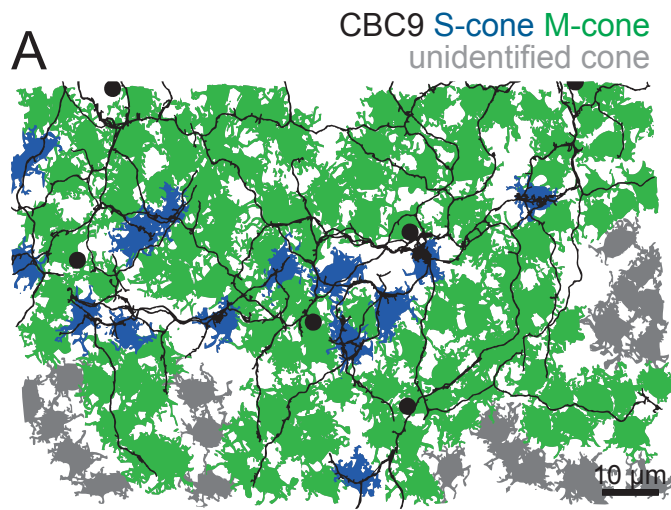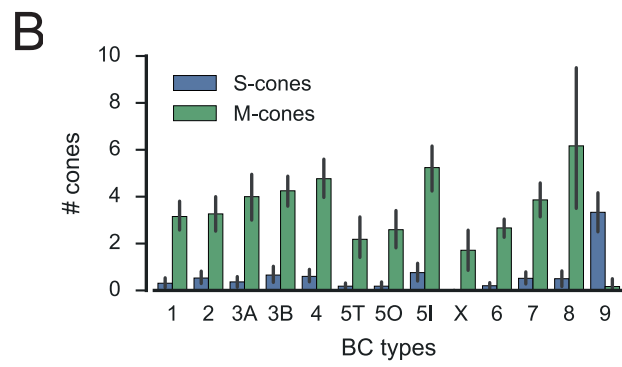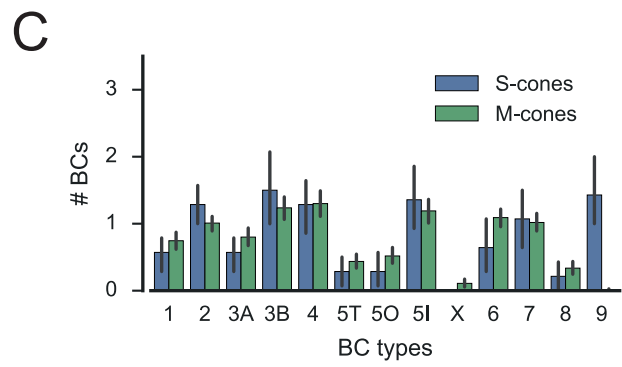

Supplement: supp [file elife_poa_e20041_Figure_3_figure_supplement_2.pdf › elife_poa_e20041_Figure_3_figure_supplement_2.pdf]

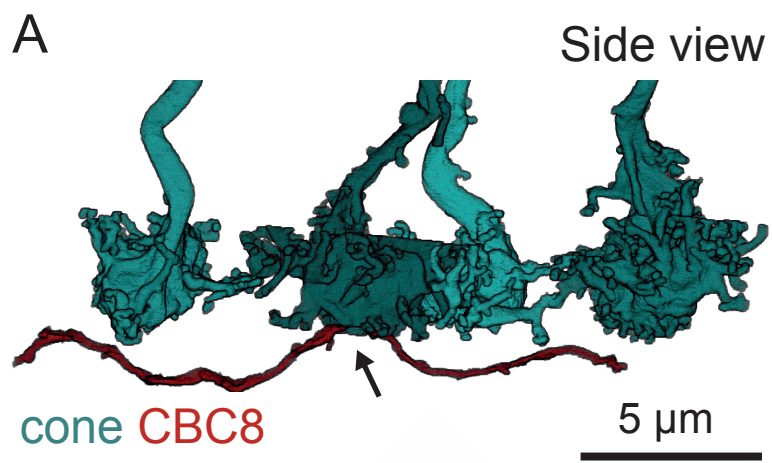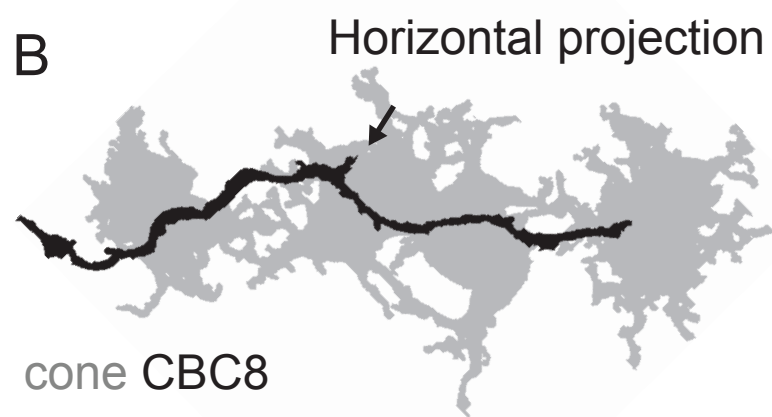

Supplement: supp [file elife_poa_e20041_Figure_3_figure_supplement_3.pdf › elife_poa_e20041_Figure_3_figure_supplement_3.pdf]

A

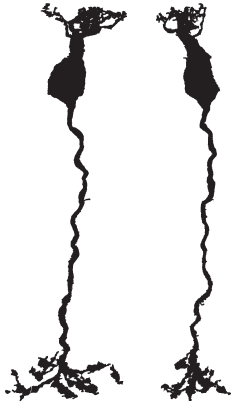

B

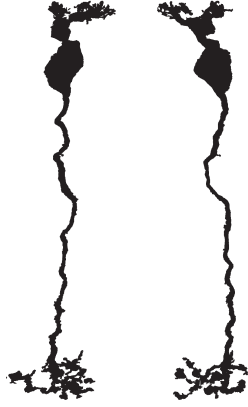

C

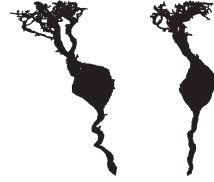

D

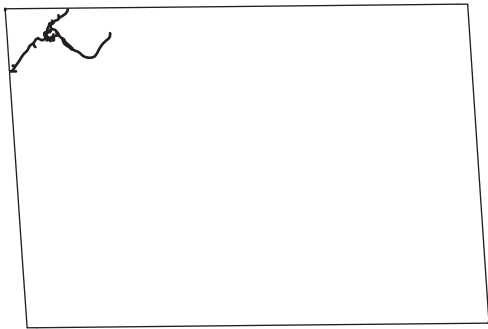

Dendrites

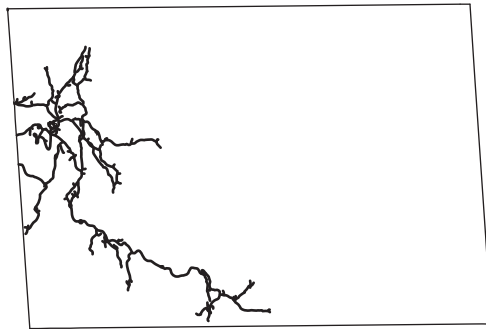

Axon terminal

Supplement: supp [file elife_poa_e20041_Figure_5_figure_supplement_1.pdf › elife_poa_e20041_Figure_5_figure_supplement_1.pdf]

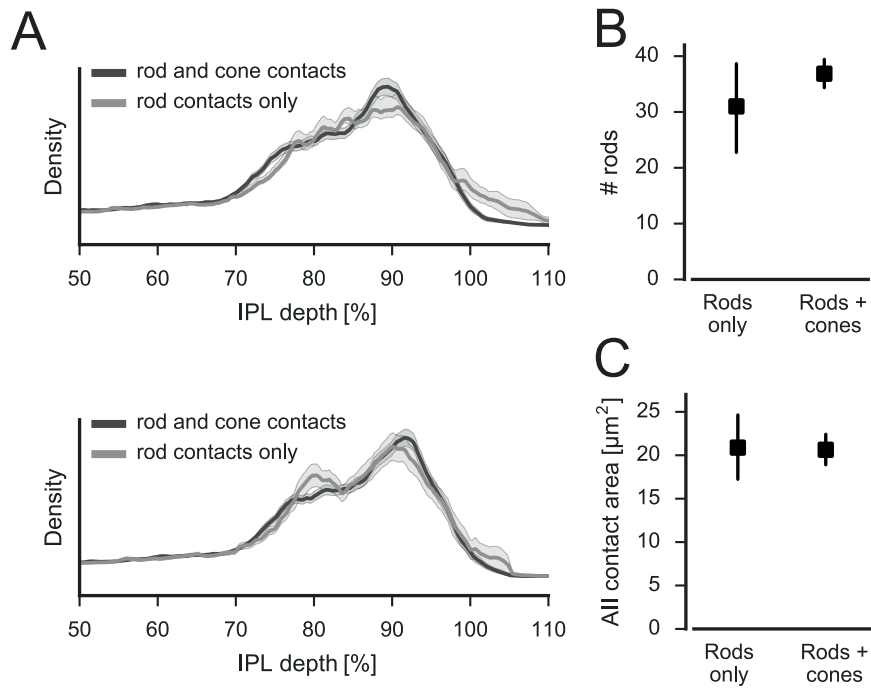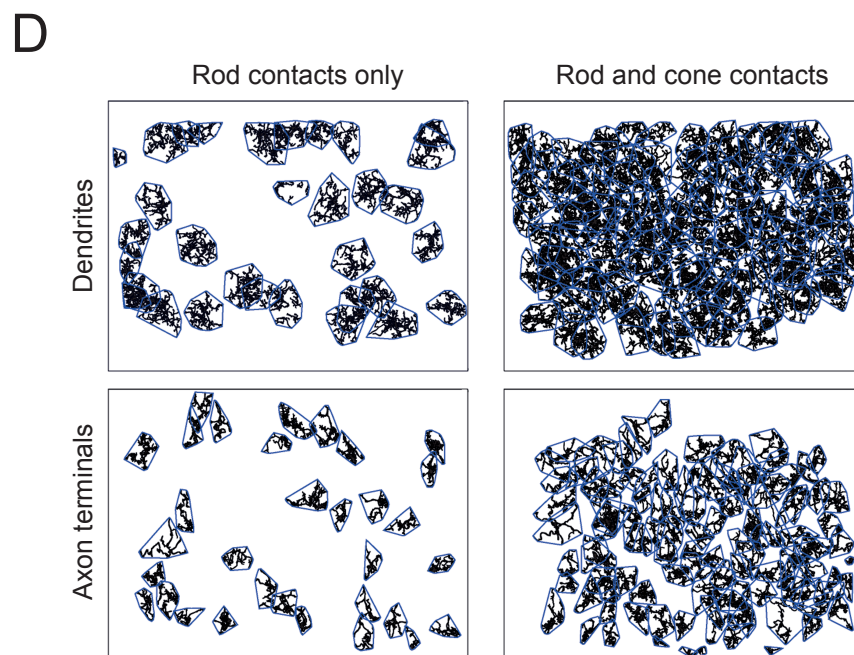

Supplement: supp [file elife_poa_e20041_Figure_5_figure_supplement_2.pdf › elife_poa_e20041_Figure_5_figure_supplement_2.pdf]

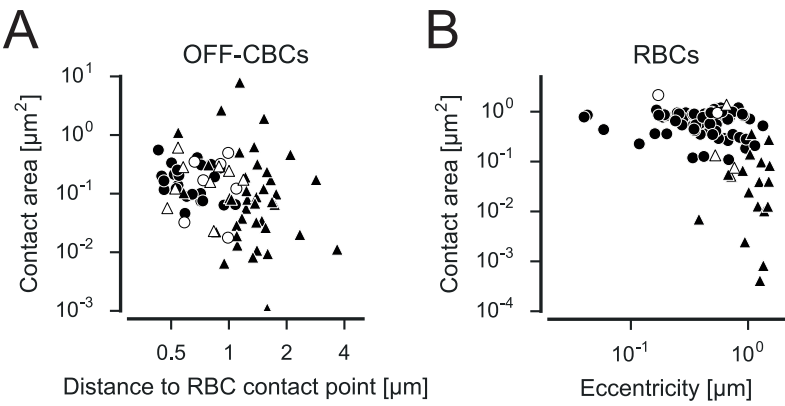

Supplement: supp [file elife_poa_e20041_Figure_6_figure_supplement_1.pdf › elife_poa_e20041_Figure_6_figure_supplement_1.pdf]
